# Supplementary material
Source: HighWire-hosted journal article supplement (https://bmjopen.bmj.com/content/11/7/e046647)
Supplement: inline-supplementary-material-1 [file inline-supplementary-material-1.pdf]

## Supplementary material

### Appendix 1. Details of the search terms and limiters used

|                                                                                                                                                                                                                                                                                                                                                                                                                                                                                                                                                                                                                                                                                                                                                                                                                                                                                                                      |
|----------------------------------------------------------------------------------------------------------------------------------------------------------------------------------------------------------------------------------------------------------------------------------------------------------------------------------------------------------------------------------------------------------------------------------------------------------------------------------------------------------------------------------------------------------------------------------------------------------------------------------------------------------------------------------------------------------------------------------------------------------------------------------------------------------------------------------------------------------------------------------------------------------------------|
| <b>Limiters used</b>                                                                                                                                                                                                                                                                                                                                                                                                                                                                                                                                                                                                                                                                                                                                                                                                                                                                                                 |
| 2010+ and English                                                                                                                                                                                                                                                                                                                                                                                                                                                                                                                                                                                                                                                                                                                                                                                                                                                                                                    |
| <b>Mental health related terms</b>                                                                                                                                                                                                                                                                                                                                                                                                                                                                                                                                                                                                                                                                                                                                                                                                                                                                                   |
| mental health, mental illness, mental distress, mental disturbance, mental disorder*, psychiatric, inpatient ward, suicid*, self-harm, forensic psych*, residential rehabilitation, dementia, Prevention, Recovery care, PARCS, psychosis, substance use*, substance abuse, mentally ill, emotional or sexual trauma, emotional crisis                                                                                                                                                                                                                                                                                                                                                                                                                                                                                                                                                                               |
| Mental Disorders/, Mentally Ill Persons/, Dementia/ Hospitals, Psychiatric/, Mental Health/ Substance related disorders/                                                                                                                                                                                                                                                                                                                                                                                                                                                                                                                                                                                                                                                                                                                                                                                             |
| <b>Aggression and Restraint/Seclusion related terms</b>                                                                                                                                                                                                                                                                                                                                                                                                                                                                                                                                                                                                                                                                                                                                                                                                                                                              |
| Aggressi*, conflict or violen*, assault*, recovery, trauma-informed, distress*, de-stress*, deescalat*, de-escalat*, escalat*, calming, therapeutic milieu, institutional climate, living climate, social climate, social interaction*, person-centred, person-centered, recovery-oriented, recovery-focused, recovery-focussed, safe ward*, safeward*, risk manag*, safety manag*, prevention strategy*, ward atmosphere or climate                                                                                                                                                                                                                                                                                                                                                                                                                                                                                 |
| Aggression/, Conflict (Psychology), Violence/, Therapeutic Community/, Risk Management/, Safety Management/, Patient Centered Care/                                                                                                                                                                                                                                                                                                                                                                                                                                                                                                                                                                                                                                                                                                                                                                                  |
| restraint*, restrained, seclusion, coerc*, confin*, constrain*, immobili*, isolation, restrict*, segregat*, separation, compulsory treatment                                                                                                                                                                                                                                                                                                                                                                                                                                                                                                                                                                                                                                                                                                                                                                         |
| Restraint, Physical/, Social Isolation/ Coercion/, Immobilization/                                                                                                                                                                                                                                                                                                                                                                                                                                                                                                                                                                                                                                                                                                                                                                                                                                                   |
| <b>Architecture/ Design related terms</b>                                                                                                                                                                                                                                                                                                                                                                                                                                                                                                                                                                                                                                                                                                                                                                                                                                                                            |
| architectur*, physical design*, built environment*, therapeutic environment, nursing station*, amenity, amenities, ambiance, interior design*, light*, daylight, sunlight, noise, sound, acoustic*, facility size, crowding, ward density, ward occupancy, patient density, occupancy rate*, social density, spatial density, way-finding, furnish*, furniture, recreation*, space*, green space*, garden, outdoor, sensory room*, sensory space*, sensory modulation, psychosocially supportive design, evidence-based design, environmental psychology, design environment*, environmental effect, design planning, visual environment*, physical environment, ward configuration, purpose built, ward design, comfort room*, facility* design, facility* layout, texture, flexibility, adaptability, privacy, surveillance, observation, color, colour, contrast, art, artwork, domestic, home, homely, home-like |
| Architecture/, Sunlight/, lighting/, Environment Design/, Environmental Psychology/, spatial behavior/, crowding/, personal space/, spatial navigation/, territoriality/, Nursing Stations/, location directories and signs/, interior design and furnishings/, architectural accessibility/, hospital design and construction/, Facility Design and Construction/                                                                                                                                                                                                                                                                                                                                                                                                                                                                                                                                                   |
