# Supplementary material
Source: HighWire-hosted journal article supplement (https://bmjopen.bmj.com/content/11/7/e046647)
Supplement: inline-supplementary-material-2 [file inline-supplementary-material-2.pdf]

## Supplementary material

### Appendix 2. Critical appraisal results

#### Supplementary table 1. JBI critical assessment for case-controlled trials

(reproduced from Brophy L, Oostermeijer S, Minshall C, Harvey C, Hamilton B, Roper C, Martel A, Fletcher J. Designing mental health facilities that prevent the use of seclusion and restraint: an Evidence Check rapid review brokered by the Sax Institute ([www.saxinstitute.org.au](http://www.saxinstitute.org.au)) for the NSW Ministry of Health, 2020.Appendix 1)

|                                                                                                                  | Andersen et al., 2017 |
|------------------------------------------------------------------------------------------------------------------|-----------------------|
| 1. Were the groups comparable other than the presence of disease in cases or the absence of disease in controls? | UC                    |
| 2. Were cases and controls matched appropriately?                                                                | UC                    |
| 3. Were the same criteria used for identification of cases and controls?                                         | UC                    |
| 4. Was exposure measured in a standard, valid and reliable way?                                                  | UC                    |
| 5. Was exposure measured in the same way for cases and controls?                                                 | UC                    |
| 6. Were confounding factors identified?                                                                          | UC                    |
| 7. Were strategies to deal with confounding factors stated?                                                      | UC                    |
| 8. Were outcomes assessed in a standard, valid and reliable way for cases and controls?                          | UC                    |
| 9. Was the exposure period of interest long enough to be meaningful?                                             | UC                    |
| 10. Was appropriate statistical analysis used?                                                                   | UC                    |

Note. UC = unclear.

## Supplementary table 2. JBI critical assessment for non-randomised trial

(reproduced from Brophy L, Oostermeijer S, Minshall C, Harvey C, Hamilton B, Roper C, Martel A, Fletcher J. Designing mental health facilities that prevent the use of seclusion and restraint: an Evidence Check rapid review brokered by the Sax Institute ([www.saxinstitute.org.au](http://www.saxinstitute.org.au)) for the NSW Ministry of Health, 2020.Appendix 1)

|                                                     | Ash et al., 2015 | Bak et al., 2014 | Blair et al., 2017 | Bobier et al., 2015 | Borckardt et al., 2011 | Bowers et al., 2010 | Bowers et al., 2012 | Cummings et al., 2010 | Eggert et al., 2014 | Espinosa et al., 2015 | Fletcher et al., 2019 | Georgieva et al., 2010 | Jenkins et al., 2014 | Lloyd et al., 2014 | Madan et al., 2014 | Maguire et al., 2012 | Mann-Poll et al., 2011 | Novak et al., 2012 | Seckman et al., 2017 | Sivak, 2012 | Smith & Jones., 2014 | Southard et al., 2012 | Trzpcu et al., 2016 | Ulrich et al., 2018 | van der Schaaf et al., 2013 | Yakov et al., 2018 |
|-----------------------------------------------------|------------------|------------------|--------------------|---------------------|------------------------|---------------------|---------------------|-----------------------|---------------------|-----------------------|-----------------------|------------------------|----------------------|--------------------|--------------------|----------------------|------------------------|--------------------|----------------------|-------------|----------------------|-----------------------|---------------------|---------------------|-----------------------------|--------------------|
| 1. Is it clear in the study what is the 'cause' and | Y                | UC               | Y                  | Y                   | Y                      | Y                   | Y                   | UC                    | N                   | N                     | Y                     | Y                      | Y                    | Y                  | UC                 | UC                   | Y                      | Y                  | UC                   | UC          | Y                    | UC                    | UC                  | Y                   | UC                          | Y                  |
| 2. Were the participants included in any            | UC               | UC               | Y                  | Y                   | Y                      | UC                  | UC                  | UC                    | UC                  | UC                    | NA                    | NA                     | Y                    | UC                 | UC                 | UC                   | NA                     | Y                  | Y                    | UC          | Y                    | UC                    | UC                  | Y                   | UC                          | UC                 |
| 3. Were the participants included in any            | Y                | UC               | Y                  | Y                   | Y                      | UC                  | UC                  | UC                    | UC                  | UC                    | NA                    | UC                     | Y                    | Y                  | UC                 | UC                   | NA                     | Y                  | Y                    | UC          | Y                    | UC                    | UC                  | UC                  | UC                          | UC                 |
| 4. Was there a control/ comparison group?           | UC               | UC               | Y                  | Y                   | Y                      | UC                  | UC                  | UC                    | UC                  | UC                    | NA                    | N                      | Y                    | Y                  | Y                  | Y                    | NA                     | Y                  | Y                    | UC          | Y                    | N                     | N                   | Y                   | Y                           | Y                  |
| 5. Were there multiple measurements of the          | Y                | UC               | Y                  | Y                   | Y                      | UC                  | UC                  | UC                    | UC                  | UC                    | NA                    | UC                     | Y                    | UC                 | UC                 | UC                   | NA                     | Y                  | Y                    | UC          | UC                   | UC                    | Y                   | Y                   | UC                          | UC                 |
| 6. Was follow-up complete and if not, were the      | UC               | UC               | Y                  | UC                  | Y                      | UC                  | UC                  | UC                    | UC                  | UC                    | Y                     | UC                     | UC                   | UC                 | UC                 | UC                   | NA                     | UC                 | NC                   | UC          | UC                   | UC                    | UC                  | UC                  | UC                          | UC                 |
| 7. Were the outcomes of participants' comparisons   | UC               | UC               | Y                  | Y                   | Y                      | UC                  | UC                  | UC                    | Y                   | UC                    | Y                     | UC                     | Y                    | Y                  | Y                  | Y                    | Y                      | Y                  | Y                    | UC          | UC                   | Y                     | Y                   | UC                  | Y                           | Y                  |
| 8. Were outcomes measured in a reliable way?        | UC               | UC               | Y                  | UC                  | Y                      | UC                  | UC                  | N                     | UC                  | UC                    | Y                     | N                      | Y                    | UC                 | UC                 | UC                   | UC                     | UC                 | UC                   | N           | UC                   | UC                    | UC                  | UC                  | Y                           | UC                 |
| 9. Was appropriate statistical analysis used?       | UC               | UC               | Y                  | UC                  | Y                      | UC                  | UC                  | N                     | UC                  | UC                    | Y                     | N                      | Y                    | UC                 | UC                 | UC                   | Y                      | Y                  | UC                   | N           | UC                   | UC                    | UC                  | UC                  | Y                           | UC                 |

Note. Y= yes, N= no, UC = Unclear, NA = not applicable.

## Supplementary table 3. JBI critical assessment of qualitative studies

(reproduced from Brophy L, Oostermeijer S, Minshall C, Harvey C, Hamilton B, Roper C, Martel A, Fletcher J. Designing mental health facilities that prevent the use of seclusion and restraint: an Evidence Check rapid review brokered by the Sax Institute ([www.saxinstitute.org.au](http://www.saxinstitute.org.au)) for the NSW Ministry of Health, 2020.Appendix 1)

|                                                                                                | Björkdahl et al., 2016 | Brophy et al., 2016a | Brophy et al., 2016b | Fletcher et al., 2019 | Forsyth et al., 2018 | Lindberg et al., 2019 | Muir-Cochrane et al., 2015 | Rose et al., 2015 | Smith & Jones al., 2014 | Trzpcuc et al., 2016 |
|------------------------------------------------------------------------------------------------|------------------------|----------------------|----------------------|-----------------------|----------------------|-----------------------|----------------------------|-------------------|-------------------------|----------------------|
| 1. Is there congruity between the philosophical perspective and the research?                  | Y                      | Y                    | Y                    | Y                     | Y                    | Y                     | Y                          | Y                 | UC                      | Y                    |
| 2. Is there congruity between the research methodology and the research question?              | Y                      | Y                    | Y                    | Y                     | Y                    | Y                     | UC                         | UC                | UC                      | Y                    |
| 3. Is there congruity between the research methodology and data collection?                    | UC                     | Y                    | Y                    | Y                     | Y                    | Y                     | UC                         | Y                 | Y                       | UC                   |
| 4. Is there congruity between the research methodology and the data analysis?                  | UC                     | Y                    | Y                    | Y                     | Y                    | Y                     | Y                          | Y                 | UC                      | Y                    |
| 5. Is there congruity between the research methodology and the interpretation of results?      | Y                      | Y                    | Y                    | Y                     | Y                    | Y                     | Y                          | Y                 | UC                      | Y                    |
| 6. Is there a statement locating the researcher culturally or theoretically?                   | UC                     | Y                    | Y                    | UC                    | UC                   | UC                    | UC                         | Y                 | UC                      | Y                    |
| 7. Is the influence of the researcher on the research, and vice- versa, addressed?             | UC                     | Y                    | Y                    | Y                     | UC                   | UC                    | UC                         | UC                | UC                      | Y                    |
| 8. Are participants, and their voices, adequately represented?                                 | Y                      | Y                    | Y                    | Y                     | Y                    | Y                     | Y                          | Y                 | UC                      | Y                    |
| 9. Is the research ethical according to current criteria or, evidence of ethical approval?     | Y                      | Y                    | Y                    | Y                     | Y                    | Y                     | Y                          | Y                 | Y                       | N                    |
| 10. Do the conclusions drawn in the research report flow from the analysis, or interpretation? | UC                     | Y                    | Y                    | Y                     | Y                    | Y                     | Y                          | Y                 | UC                      | Y                    |

Note. Y= yes, UC = Unclear.

## Supplementary table 4. JBI critical assessment of expert opinion publications

(reproduced from Brophy L, Oostermeijer S, Minshall C, Harvey C, Hamilton B, Roper C, Martel A, Fletcher J. Designing mental health facilities that prevent the use of seclusion and restraint: an Evidence Check rapid review brokered by the Sax Institute ([www.saxinstitute.org.au](http://www.saxinstitute.org.au)) for the NSW Ministry of Health, 2020.Appendix 1)

|                                                                                                             | Dresler et al., 2015 |
|-------------------------------------------------------------------------------------------------------------|----------------------|
| 1. Is the source of the opinion clearly identified?                                                         | Y                    |
| 2. Does the source of opinion have standing in the field of expertise?                                      | Y                    |
| 3. Are the interests of the relevant population the central focus of the opinion?                           | UC                   |
| 4. Is the stated position the result of an analytical process, and is there logic in the opinion expressed? | UC                   |
| 5. Is there reference to the extant literature?                                                             | Y                    |
| 6. Is any incongruence with the literature/sources logically defended?                                      | UC                   |

Note. Y= yes, UC = Unclear.
